# Supplementary material for: Academic pharmacist competencies in ordinary and emergency situations: content validation and pilot description in Lebanese academia
Source: PubMed Central journal article supplement (PMC10559412; doi:10.1186/s12909-023-04712-4), 2023-10-06
Supplement: 12909_2023_4712_MOESM1_ESM.pdf [file 12909_2023_4712_MOESM1_ESM.pdf]

## Advanced Competencies for Academia Pharmacists

Dear pharmacist,

You are invited to participate in a survey about advanced competencies and skills acquired upon graduation of your highest degree related to your current field of work.

This study conducted by a group of academic researchers aims to determine the domains that need strengthening for an optimal-performing public health system.

Your participation in this study is voluntary and anonymous, and the information gathered in this 20-minute questionnaire will be treated confidentially. By completing it, you are consenting to participate in this study.

We thank you in advance for your time,

The research team.

### Informed consent

Please check all the boxes to proceed to the survey

- I have read and understood the above information
- I understand that my participation is voluntary
- I understand that my data will be kept confidential
- I agree to participate in this study

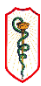

## DEMOGRAPHICS

---

1. **Age:**
2. **Gender:**  M  F
3. **Level of education:**  
 BS Pharmacy  PharmD/DPharm  Masters  PhD  Other:
4. **Highest degree related to your main field of work:**  
 BS Pharmacy  PharmD/DPharm  Masters  PhD  Other:
5. **Year of graduation from school/faculty of pharmacy:**
6. **University you graduated from as a pharmacist:**  
 UL  USJ  BAU  LAU  LIU  Other, country:
7. **University you earned your highest degree from:**  
 UL  USJ  BAU  LAU  LIU  Other, country:
8. **What is your specialty?**
9. **Language of pharmacy education:**  
 French  English  Other:
10. **Work Location:**  
 Beirut  Mount Lebanon  North Lebanon  South Lebanon  Beqaa  
 Currently not working
11. **Number of working days per week:**
12. **Number of working hours per day:**
13. **How long (in years) have you been teaching pharmacy?**
14. **Do you have another field of work? (Please select all that apply)**  
 I do not have another field of work  
 Community pharmacy  
 Clinical pharmacy  
 Research  
 Other:



### ACADEMIA PHARMACIST COMPETENCIES

| QUESTION:<br>How confident are you in applying the below academic teachers' competencies?                                                   | Very confident | Fairly confident | Neither/ I don't know | Slightly confident | Not confident at all |
|---------------------------------------------------------------------------------------------------------------------------------------------|----------------|------------------|-----------------------|--------------------|----------------------|
| <b>0 Design, plan and organize teaching and learning opportunities, courses and/or programs of study.</b>                                   |                |                  |                       |                    |                      |
| <b>0.1</b> Plan and prepare new learning activities which take into account factors including study level and context.                      |                |                  |                       |                    |                      |
| <b>0.2</b> Align learning activities to the course and program learning outcomes.                                                           |                |                  |                       |                    |                      |
| <b>0.3</b> Collaborate in the design of a range of learning activities (face to face, distance or blended) to meet learning outcomes.       |                |                  |                       |                    |                      |
| <b>0.4</b> Align formative and summative assessment with teaching strategies and subject matter to measure attainment of learning outcomes. |                |                  |                       |                    |                      |
| <b>0.5</b> Consider learning and teaching approaches which acknowledge the needs of diverse learners.                                       |                |                  |                       |                    |                      |
| <b>1 Teach and/or support learning.</b>                                                                                                     |                |                  |                       |                    |                      |
| <b>1.1</b> Foster student-centered and interactive learning and teaching approaches through a variety of activities.                        |                |                  |                       |                    |                      |
| <b>1.2</b> Engage students in creative and independent learning outside formal learning environments.                                       |                |                  |                       |                    |                      |
| <b>1.3</b> Integrate the development of transferable and soft skills in teaching.                                                           |                |                  |                       |                    |                      |
| <b>1.4</b> Stimulate curiosity and interest in the subject areas that encourage life-long learning.                                         |                |                  |                       |                    |                      |
| <b>1.5</b> Emphasize the importance of ethical behavior in all aspects of the pharmacy profession                                           |                |                  |                       |                    |                      |
| <b>2 Assess student learning and provide feedback to ensure student advancement.</b>                                                        |                |                  |                       |                    |                      |
| <b>2.1</b> Use an appropriate range of formative and summative assessment techniques.                                                       |                |                  |                       |                    |                      |
| <b>2.2</b> Align assessment strategies to learning outcomes.                                                                                |                |                  |                       |                    |                      |
| <b>2.3</b> Design clear, unambiguous assessment criteria and communicate them electively to students.                                       |                |                  |                       |                    |                      |
| <b>2.4</b> Provide constructive and timely feedback to students through a range of approaches.                                              |                |                  |                       |                    |                      |
| <b>2.5</b> Provide constructive and timely feedback to students through a range of approaches..                                             |                |                  |                       |                    |                      |
| <b>3 Create effective and innovative learning environments to optimize learning.</b>                                                        |                |                  |                       |                    |                      |
| <b>3.1</b> Develop and use inclusive formal and informal learning environments appropriate to learners' needs.                              |                |                  |                       |                    |                      |



|                                                                                                                                                                                                               |                                                |  |  |  |  |
|---------------------------------------------------------------------------------------------------------------------------------------------------------------------------------------------------------------|------------------------------------------------|--|--|--|--|
| <b>3.2</b> Ensure learners are able to access and use resources / facilities effectively to guide learning.                                                                                                   |                                                |  |  |  |  |
| <b>3.3</b> Provide opportunities for students to participate in relevant extra-curricular and co-curricular activities and support for career planning.                                                       |                                                |  |  |  |  |
| <b>3.4</b> Abide by relevant codes of ethics and academic integrity.                                                                                                                                          |                                                |  |  |  |  |
| <b>3.5</b> Integrate subject-based research in teaching and learning in a meaningful and appropriate way.                                                                                                     |                                                |  |  |  |  |
| <b>3.6</b> Effectively integrate appropriate educational technologies in the teaching and learning process.                                                                                                   |                                                |  |  |  |  |
| <b>3.7</b> Engage students in relevant aspects of professional practice.                                                                                                                                      |                                                |  |  |  |  |
| <b>4 Provide effective student support and guidance.</b>                                                                                                                                                      |                                                |  |  |  |  |
| <b>4.1</b> Support learners' transitions through provision of appropriate orientation and induction activities.                                                                                               |                                                |  |  |  |  |
| <b>4.2</b> Provide support to learners through academic advising/tutoring.                                                                                                                                    |                                                |  |  |  |  |
| <b>4.3</b> Access other support and professional services as necessary.                                                                                                                                       |                                                |  |  |  |  |
| <b>4.4</b> Refer learners to appropriate institutional and community support as necessary.                                                                                                                    |                                                |  |  |  |  |
| <b>4.5</b> Respond appropriately to learners' individual needs.                                                                                                                                               |                                                |  |  |  |  |
| <b>5 Professional development.</b>                                                                                                                                                                            |                                                |  |  |  |  |
| <b>5.1</b> Participate in regular professional development activities.                                                                                                                                        |                                                |  |  |  |  |
| <b>5.2</b> Gather information on the effectiveness of own practice through actively reflecting on feedback from a range of sources, including students, to inform and enhance own practice.                   |                                                |  |  |  |  |
| <b>5.3</b> Support the professional development of colleagues.                                                                                                                                                |                                                |  |  |  |  |
| <b>5.4</b> Disseminate and share own and others' successful practice and initiatives.                                                                                                                         |                                                |  |  |  |  |
| <b>5.5</b> Engage with interdisciplinary initiatives and/or o professional bodies and organizations.                                                                                                          |                                                |  |  |  |  |
| <b>5.6</b> Incorporate research within own professional practice.                                                                                                                                             |                                                |  |  |  |  |
| <b>5.7</b> Be active in professional organizations.                                                                                                                                                           |                                                |  |  |  |  |
| <b>6 Pharmacist Emergency Preparedness and Response (EPR)</b>                                                                                                                                                 | <b>6.1 Emergency Preparedness and Response</b> |  |  |  |  |
| <b>6.1.1</b> Check for volunteering opportunities                                                                                                                                                             |                                                |  |  |  |  |
| <b>6.1.2</b> Check for training opportunities                                                                                                                                                                 |                                                |  |  |  |  |
| <b>6.1.3</b> Create a course on pharmacy-related emergency preparedness                                                                                                                                       |                                                |  |  |  |  |
| <b>6.1.4</b> Educate students about the ongoing crisis using evidence-based information and communications, including medication supply, panic buying, at risk populations, vaccines, and testing services... |                                                |  |  |  |  |
| <b>6.1.5</b> Partner with local authorities for educational activities                                                                                                                                        |                                                |  |  |  |  |
| <b>6.1.6</b> Follow actions and recommendations of local authorities                                                                                                                                          |                                                |  |  |  |  |
| <b>6 Pharmacist Preparedness and Response in Emergency Situations</b>                                                                                                                                         | <b>6.2 Operations Management</b>               |  |  |  |  |



|                                                                                                                    |                                                                            |  |  |  |  |
|--------------------------------------------------------------------------------------------------------------------|----------------------------------------------------------------------------|--|--|--|--|
| 6.2.1 Monitor students and workers/assistants for symptoms                                                         |                                                                            |  |  |  |  |
| 6.3.2 Answer EPR-related calls                                                                                     |                                                                            |  |  |  |  |
| 6.3.3 Participate in interdisciplinary training to EPR teams                                                       |                                                                            |  |  |  |  |
| <b>6 Pharmacist Preparedness and Response in Emergency Situations</b>                                              | <b>6.4 Evaluation, Research, and Dissemination for Impact and Outcomes</b> |  |  |  |  |
| 6.4.1 Participate in research and studies on EPR                                                                   |                                                                            |  |  |  |  |
| 6.4.2 Publish and/or disseminate findings                                                                          |                                                                            |  |  |  |  |
| 6.4.3 Combat misinformation by disseminating evidence-based information to patients and sharing it on social media |                                                                            |  |  |  |  |
| 6.4.4 Develop training programs to students, peers, and other staff workers                                        |                                                                            |  |  |  |  |

1. **What percentage of these competencies did you acquire during your undergraduate studies?**
2. **What percentage of these competencies did you acquire during your postgraduate studies?**
3. **What percentage of these competencies did you acquire from continuing education sessions?**
4. **What percentage of these competencies did you acquire by experience?**
