# Supplementary material for: Academic pharmacist competencies in ordinary and emergency situations: content validation and pilot description in Lebanese academia
Source: PubMed Central journal article supplement (PMC10559412; doi:10.1186/s12909-023-04712-4), 2023-10-06
Supplement: 12909_2023_4712_MOESM2_ESM.pdf [file 12909_2023_4712_MOESM2_ESM.pdf]

## Advanced Competencies for Research Pharmacists

Dear pharmacist,

You are invited to participate in a survey about advanced competencies and skills acquired upon graduation of your highest degree related to your current field of work.

This study conducted by a group of academic researchers aims to determine the domains that need strengthening for an optimal-performing public health system.

Your participation in this study is voluntary and anonymous, and the information gathered in this 20-minute questionnaire will be treated confidentially. By completing it, you are consenting to participate in this study.

We thank you in advance for your time,

The research team.

### Informed consent

Please check all the boxes to proceed to the survey

- I have read and understood the above information
- I understand that my participation is voluntary
- I understand that my data will be kept confidential
- I agree to participate in this study

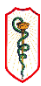

## DEMOGRAPHICS

---

1. **Age:**
2. **Gender:**  M  F
3. **Level of education:**  
 BS Pharmacy  PharmD/DPharm  Masters  PhD  Other:
4. **Highest degree related to your main field of work:**  
 BS Pharmacy  PharmD/DPharm  Masters  PhD  Other:
5. **Year of graduation from school/faculty of pharmacy:**
6. **University you graduated from as a pharmacist:**  
 UL  USJ  BAU  LAU  LIU  Other, country:
7. **University you earned your highest degree from:**  
 UL  USJ  BAU  LAU  AUB  LIU  Other, country:
8. **What is your specialty?**
9. **Language of pharmacy education:**  
 French  English  Other:
10. **Work Location:**  
 Beirut  Mount Lebanon  North Lebanon  South Lebanon  Beqaa  
 Currently not working
11. **Number of working days per week:**
12. **Number of working hours per day:**
13. **How long (in years) have you been a research pharmacist?**
14. **Do you have another field of work? (Please select all that apply)**  
 I do not have another field of work  
 Academia (teaching)  
 Community pharmacy  
 Hospital pharmacy  
 Clinical pharmacy  
 Clinical preceptor  
 Research  
 Industry  
 Sales/Marketing  
 Other:



### RESEARCH PHARMACIST COMPETENCIES

| <p>QUESTION:</p> <p>How confident are you in applying the below researcher competencies?</p>                                                                 | Very confident                                                                                                   | Fairly confident | Neither/ I don't know | Slightly confident | Not confident at all |
|--------------------------------------------------------------------------------------------------------------------------------------------------------------|------------------------------------------------------------------------------------------------------------------|------------------|-----------------------|--------------------|----------------------|
| <b>0 General Research &amp; Soft Skills</b>                                                                                                                  | <b>0.1 Critical thinking/Scientific Inquisitiveness/Ethical Thinking and Research Conduct/Strategic Thinking</b> |                  |                       |                    |                      |
| 0.1.1 Search for, read, and criticize scientific articles.                                                                                                   |                                                                                                                  |                  |                       |                    |                      |
| 0.1.2 Identify gaps in the literature.                                                                                                                       |                                                                                                                  |                  |                       |                    |                      |
| 0.1.3 Generate relevant biomedical, clinical, public health or translational research hypothesis.                                                            |                                                                                                                  |                  |                       |                    |                      |
| 0.1.4 Dedicate time to read and improve one's knowledge.                                                                                                     |                                                                                                                  |                  |                       |                    |                      |
| 0.1.5 Describe the current state of knowledge about a specific topic.                                                                                        |                                                                                                                  |                  |                       |                    |                      |
| 0.1.6 Apply the ethical research principles in one's activity.                                                                                               |                                                                                                                  |                  |                       |                    |                      |
| 0.1.7 Design proper research strategies and policies.                                                                                                        |                                                                                                                  |                  |                       |                    |                      |
| 0.1.8 Translate research discoveries into meaningful changes in human health.                                                                                |                                                                                                                  |                  |                       |                    |                      |
| 0.1.9 Identify key ethical and methodological issues impacting research design and validity, including statistical techniques.                               |                                                                                                                  |                  |                       |                    |                      |
| 0.1.10 Demonstrate knowledge of the standards of professional and ethical conduct to protect human subjects enrolled in clinical research.                   |                                                                                                                  |                  |                       |                    |                      |
| 0.1.11 Identify ethical and professional issues associated to any type of research: conflict of interest, plagiarism, authorship, and intellectual property. |                                                                                                                  |                  |                       |                    |                      |
| <b>0 General Research Skills</b>                                                                                                                             | <b>0.2 Written and Oral Communication/ Grantsmanship</b>                                                         |                  |                       |                    |                      |
| 0.2.1 Write adequate project proposals (to apply for IRB and grants).                                                                                        |                                                                                                                  |                  |                       |                    |                      |
| 0.2.2 Defend a written research proposal.                                                                                                                    |                                                                                                                  |                  |                       |                    |                      |
| 0.2.3 Prepare and deliver oral and written scientific information.                                                                                           |                                                                                                                  |                  |                       |                    |                      |
| 0.2.4 Communicate the results of their work adequately.                                                                                                      |                                                                                                                  |                  |                       |                    |                      |
| <b>0 Soft Skills</b>                                                                                                                                         | <b>0.3 Interprofessional Collaboration &amp; Teamwork/Leadership</b>                                             |                  |                       |                    |                      |
| 0.3.1 Function in a multidisciplinary team.                                                                                                                  |                                                                                                                  |                  |                       |                    |                      |
| 0.3.2 Supervise others undertaking research.                                                                                                                 |                                                                                                                  |                  |                       |                    |                      |
| 0.3.3 Lead research teams and research units successfully.                                                                                                   |                                                                                                                  |                  |                       |                    |                      |
| 0.3.4 Collaborate with others as needed to conduct and present research findings.                                                                            |                                                                                                                  |                  |                       |                    |                      |



|                                                                                                                   |                                                                    |  |  |  |  |
|-------------------------------------------------------------------------------------------------------------------|--------------------------------------------------------------------|--|--|--|--|
| <b>0 Soft Skills</b>                                                                                              | <b>0.4 Project Management, Planning, and Time Management</b>       |  |  |  |  |
| <b>0.4.1</b> Plan and manage human and financial resources of research projects.                                  |                                                                    |  |  |  |  |
| <b>0.4.2</b> Retrieve relevant information/evidence timely.                                                       |                                                                    |  |  |  |  |
| <b>0.4.3</b> Evaluate, prevent, and solve possible problems in research projects.                                 |                                                                    |  |  |  |  |
| <b>0 Soft Skills</b>                                                                                              | <b>0.5 Information Technology</b>                                  |  |  |  |  |
| <b>0.5.1</b> Use information technology for research purposes.                                                    |                                                                    |  |  |  |  |
| <b>1 Expertise in Fundamental Science</b>                                                                         | <b>1.1 Basic Science Expertise</b>                                 |  |  |  |  |
| <b>1.1.1</b> Acquire expert knowledge about biological and chemical processes related to pharmaceutical sciences. |                                                                    |  |  |  |  |
| <b>1.1.2</b> Master a scholarly field related to a fundamental research topic.                                    |                                                                    |  |  |  |  |
| <b>1 Expertise in Fundamental Science</b>                                                                         | <b>1.2 Analysis Tool Expertise</b>                                 |  |  |  |  |
| <b>1.2.1</b> Acquire expert knowledge about analytical processes related to pharmaceutical sciences.              |                                                                    |  |  |  |  |
| <b>1 Expertise in Fundamental Science</b>                                                                         | <b>1.3 Expertise in Conducting Fundamental Research</b>            |  |  |  |  |
| <b>1.3.1</b> Generate mechanistic hypotheses and predictions based on prior evidence.                             |                                                                    |  |  |  |  |
| <b>1.3.2</b> Plan specific experimental procedures that test particular predictions.                              |                                                                    |  |  |  |  |
| <b>1.3.3</b> Gather data via experimentation.                                                                     |                                                                    |  |  |  |  |
| <b>1.3.4</b> Analyze and interpret data appropriately.                                                            |                                                                    |  |  |  |  |
| <b>1 Expertise in Fundamental Science</b>                                                                         | <b>1.4 Drug Development Process Expertise</b>                      |  |  |  |  |
| <b>1.4.1</b> Describe and contribute to drug development processes.                                               |                                                                    |  |  |  |  |
| <b>2 Expertise in Interventional Trials</b>                                                                       | <b>2.1 Translational/Clinical Expertise</b>                        |  |  |  |  |
| <b>2.1.1</b> Master a scholarly field related to a clinical/translational research topic.                         |                                                                    |  |  |  |  |
| <b>2.1.2</b> Assess the clinical implications of scientific information.                                          |                                                                    |  |  |  |  |
| <b>2.1.3</b> Argue in favor of the clinical implications of a given research hypothesis.                          |                                                                    |  |  |  |  |
| <b>2 Expertise in Interventional Trials</b>                                                                       | <b>2.2 Analysis Tool Expertise</b>                                 |  |  |  |  |
| <b>2.2.1</b> Acquire expert knowledge on analyses related to clinical/translational research.                     |                                                                    |  |  |  |  |
| <b>2.2.2</b> Analyze and interpret data appropriately.                                                            |                                                                    |  |  |  |  |
| <b>2.2.3</b> Identify and discuss research study limitations.                                                     |                                                                    |  |  |  |  |
| <b>2.2.4</b> Present research findings, including any limitations to their interpretation and use.                |                                                                    |  |  |  |  |
| <b>2 Expertise in Interventional Trials</b>                                                                       | <b>2.3 Expertise in Conducting Clinical/Translational Research</b> |  |  |  |  |
| <b>2.3.1</b> Conceive and perform appropriate clinical/translational studies related to research hypotheses.      |                                                                    |  |  |  |  |



|                                                                                                                            |                                                                                                       |  |  |  |  |
|----------------------------------------------------------------------------------------------------------------------------|-------------------------------------------------------------------------------------------------------|--|--|--|--|
| 2.3.2 Develop appropriate methods to recruit and retain study participants for a selected research design.                 |                                                                                                       |  |  |  |  |
| 2.3.3 Generate hypotheses and predictions based on prior evidence.                                                         |                                                                                                       |  |  |  |  |
| 2.3.4 Plan specific interventional procedures that test particular predictions.                                            |                                                                                                       |  |  |  |  |
| 2.3.5 Gather data via interventions.                                                                                       |                                                                                                       |  |  |  |  |
| 2.3.6 Generate a plan for data security and management.                                                                    |                                                                                                       |  |  |  |  |
| 2.3.7 Identify essential outcomes measures to include in patient-oriented clinical trial designs.                          |                                                                                                       |  |  |  |  |
| 2.3.8 Develop appropriate conclusions based on results from research data.                                                 |                                                                                                       |  |  |  |  |
| 2.3.9 Develop an approach to overcome barriers in translating research to humans.                                          |                                                                                                       |  |  |  |  |
| <b>3 Expertise in Applied Pharmacy Fields</b>                                                                              | <b>3.1 Generating Epidemiological and Pharmaco-Epidemiological Data</b>                               |  |  |  |  |
| 3.1.1 Conduct and evaluate observational studies critically:                                                               |                                                                                                       |  |  |  |  |
| 3.1.1.1 Generate hypotheses from preexisting data.                                                                         |                                                                                                       |  |  |  |  |
| 3.1.1.2 Conceive and realize studies in pharmaco-epidemiology and pharmacy practice.                                       |                                                                                                       |  |  |  |  |
| 3.1.1.3 Develop appropriate methods to recruit and retain study participants for a selected observational research design. |                                                                                                       |  |  |  |  |
| 3.1.1.4 Identify essential outcomes measures to include in observational research.                                         |                                                                                                       |  |  |  |  |
| 3.1.1.5 Generate a plan for data security and management.                                                                  |                                                                                                       |  |  |  |  |
| 3.1.1.6 Define bias in research.                                                                                           |                                                                                                       |  |  |  |  |
| 3.1.1.7 Minimize biases and maximize causality concept evidence.                                                           |                                                                                                       |  |  |  |  |
| <b>3 Expertise in Applied Pharmacy Fields</b>                                                                              | <b>3.2 Contribution to Disease Surveillance, Drug Errors, and Side Effects Surveillance</b>           |  |  |  |  |
| 3.2.1 Apply epidemiological surveillance techniques.                                                                       |                                                                                                       |  |  |  |  |
| 3.2.2 Apply pharmacovigilance techniques.                                                                                  |                                                                                                       |  |  |  |  |
| <b>3 Expertise in Applied Pharmacy Fields</b>                                                                              | <b>3.3 Validation of Measurement Tools (particularly those related to pharmacy and public health)</b> |  |  |  |  |
| 3.3.1 Conceive and validate measurement tools on a given population.                                                       |                                                                                                       |  |  |  |  |
| <b>3 Expertise in Applied Pharmacy Fields</b>                                                                              | <b>3.4 Analysis of Associations Between Potential Risk Factors and Health Status</b>                  |  |  |  |  |
| 3.4.1 Select the appropriate statistical approach for the interpretation of preclinical and clinical datasets.             |                                                                                                       |  |  |  |  |
| 3.4.2 Analyze data using advanced statistical methods.                                                                     |                                                                                                       |  |  |  |  |



|                                                                                                                           |                                                                           |  |  |  |  |
|---------------------------------------------------------------------------------------------------------------------------|---------------------------------------------------------------------------|--|--|--|--|
| <b>3 Expertise in Applied Pharmacy Fields</b>                                                                             | <b>3.5 Comparison of Therapeutic Methods Effectiveness</b>                |  |  |  |  |
| 3.5.1 Design and perform meta-analyses.                                                                                   |                                                                           |  |  |  |  |
| <b>3 Expertise in Applied Pharmacy Fields</b>                                                                             | <b>3.6 Answering Controversial Therapeutic Matters</b>                    |  |  |  |  |
| 3.6.1 Apply principles of evidence-based medicine in judgment and research practice.                                      |                                                                           |  |  |  |  |
| <b>3 Expertise in Applied Pharmacy Fields</b>                                                                             | <b>3.7 Contribution to the Elaboration of Therapeutic Recommendations</b> |  |  |  |  |
| 3.7.1 Develop a therapeutic protocol/guideline for medications-related issues or management.                              |                                                                           |  |  |  |  |
| 3.7.2 Argue in favor of the clinical/public health implications of a given research hypothesis.                           |                                                                           |  |  |  |  |
| <b>4 Professional Development</b>                                                                                         |                                                                           |  |  |  |  |
| 4.1 Engage in regular professional development activities                                                                 |                                                                           |  |  |  |  |
| 4.2 Engage in professional organization activities                                                                        |                                                                           |  |  |  |  |
| <b>5 Pharmacist Emergency Preparedness and Response (EPR)</b>                                                             | <b>5.1 Emergency Preparedness and Response</b>                            |  |  |  |  |
| 5.1.1 Check for volunteering opportunities                                                                                |                                                                           |  |  |  |  |
| 5.1.2 Check for training opportunities                                                                                    |                                                                           |  |  |  |  |
| 5.1.3 Follow actions and recommendations of local authorities                                                             |                                                                           |  |  |  |  |
| 5.1.4 Include students, staff, and resources from educational institutions in research activity                           |                                                                           |  |  |  |  |
| <b>5 Pharmacist Preparedness and Response in Emergency Situations</b>                                                     | <b>5.2 Operations Management</b>                                          |  |  |  |  |
| 5.2.1 Develop workplace training and safety protocols (e.g., social distancing)                                           |                                                                           |  |  |  |  |
| 5.2.2 Secure PPEs or other needed materials, when applicable                                                              |                                                                           |  |  |  |  |
| 5.2.3 Monitor workers/assistants for symptoms                                                                             |                                                                           |  |  |  |  |
| 5.2.4 Adapt working hours to meet essential services during crises                                                        |                                                                           |  |  |  |  |
| 5.2.5 Secure sanitizers when needed                                                                                       |                                                                           |  |  |  |  |
| 5.2.6 Answer EPR related calls                                                                                            |                                                                           |  |  |  |  |
| 5.2.7 Participate in interdisciplinary training to EPR teams                                                              |                                                                           |  |  |  |  |
| <b>5 Pharmacist Preparedness and Response in Emergency Situations</b>                                                     | <b>5.3 Population Health Research</b>                                     |  |  |  |  |
| 5.3.1 Address medication reviews, panic buying, screening and/or testing/vaccination services safely in research activity |                                                                           |  |  |  |  |
| 5.3.2 Focus on at-risk populations in research activity                                                                   |                                                                           |  |  |  |  |
| 5.1.3 Address medication shortage and mitigation plan in research activity                                                |                                                                           |  |  |  |  |
| 5.1.4 Address stockpile and availability of drugs for existing/chronic conditions in research activity                    |                                                                           |  |  |  |  |
| 5.1.5 Partner with local authorities in research activity                                                                 |                                                                           |  |  |  |  |



| <b>5 Pharmacist Preparedness and Response in Emergency Situations</b>                                                     | <b>5.4 Evaluation, Research, and Dissemination for Impact and Outcomes</b> |  |  |  |  |
|---------------------------------------------------------------------------------------------------------------------------|----------------------------------------------------------------------------|--|--|--|--|
| <b>5.4.1</b> Lead in research and studies on EPR                                                                          |                                                                            |  |  |  |  |
| <b>5.4.2</b> Publish and/or disseminate findings                                                                          |                                                                            |  |  |  |  |
| <b>5.4.3</b> Combat misinformation by disseminating evidence-based information to patients and sharing it on social media |                                                                            |  |  |  |  |
| <b>5.4.4</b> Develop training programs to peers and other healthcare workers                                              |                                                                            |  |  |  |  |

1. **What percentage of these competencies did you acquire during your undergraduate studies?**
2. **What percentage of these competencies did you acquire during your postgraduate studies?**
3. **What percentage of these competencies did you acquire from continuing education sessions?**
4. **What percentage of these competencies did you acquire by experience?**
