# Supplementary material for: Academic pharmacist competencies in ordinary and emergency situations: content validation and pilot description in Lebanese academia
Source: PubMed Central journal article supplement (PMC10559412; doi:10.1186/s12909-023-04712-4), 2023-10-06
Supplement: 12909_2023_4712_MOESM3_ESM.pdf [file 12909_2023_4712_MOESM3_ESM.pdf]

## Advanced Competencies for Clinical Preceptor Pharmacists

Dear pharmacist,

You are invited to participate in a survey about advanced competencies and skills acquired upon graduation of your highest degree related to your current field of work.

This study conducted by a group of academic researchers aims to determine the domains that need strengthening for an optimal-performing public health system.

Your participation in this study is voluntary and anonymous, and the information gathered in this 20-minute questionnaire will be treated confidentially. By completing it, you are consenting to participate in this study.

We thank you in advance for your time,

The research team.

### Informed consent

Please check all the boxes to proceed to the survey

- I have read and understood the above information
- I understand that my participation is voluntary
- I understand that my data will be kept confidential
- I agree to participate in this study

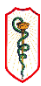

## DEMOGRAPHICS

---

1. **Age:**
2. **Gender:**  M  F
3. **Level of education:**  
 BS Pharmacy  PharmD/DPharm  Masters  PhD  Other:
4. **Highest degree related to your main field of work:**  
 BS Pharmacy  PharmD/DPharm  Masters  PhD  Other:
5. **Year of graduation from school/faculty of pharmacy:**
6. **University you graduated from as a pharmacist:**  
 UL  USJ  BAU  LAU  LIU  Other, country:
7. **University you earned your highest degree from:**  
 UL  USJ  BAU  LAU  AUB  LIU  Other, country:
8. **What is your specialty?**
9. **Language of pharmacy education:**  
 French  English  Other:
10. **Work Location:**  
 Beirut  Mount Lebanon  North Lebanon  South Lebanon  Beqaa  
 Currently not working
11. **Number of working days per week:**
12. **Number of working hours per day:**
13. **How long (in years) have you been practicing as a clinical preceptor?**
14. **Do you have another field of work? (Please select all that apply)**  
 I do not have another field of work  
 Academia (teaching)  
 Research  
 Other:



### CLINICAL PRECEPTOR COMPETENCIES

| QUESTION:<br><br>How confident are you regarding the below clinical preceptor competencies?                                                                                             | Very confident                                                  | Fairly confident | Neither/ I don't know | Slightly confident | Not confident at all |
|-----------------------------------------------------------------------------------------------------------------------------------------------------------------------------------------|-----------------------------------------------------------------|------------------|-----------------------|--------------------|----------------------|
| <b>0 Professional Development</b>                                                                                                                                                       | <b>0.1 Ethical and Professional Skills</b>                      |                  |                       |                    |                      |
| <b>0.1.1</b> Combine an empathetic and supportive attitude toward students while maintaining an unwavering commitment to excellence in patient care.                                    |                                                                 |                  |                       |                    |                      |
| <b>0.1.2</b> Combine a commitment to continuous quality improvement with reflection on action to support meaningful learning experiences.                                               |                                                                 |                  |                       |                    |                      |
| <b>0.1.3</b> Ensure that the pharmacy environment embodies the same principles of practice that they hope their student pharmacists will embrace.                                       |                                                                 |                  |                       |                    |                      |
| <b>0.1.4</b> Identify own areas for improvement and be willing to openly discuss any issues or events that need improvement as a learning experience for themselves and their students. |                                                                 |                  |                       |                    |                      |
| <b>0.1.5</b> Demonstrate a caring attitude toward students and patients.                                                                                                                |                                                                 |                  |                       |                    |                      |
| <b>0.1.6</b> Discuss the rationale used in practice with students to make sure they understand specific behaviors.                                                                      |                                                                 |                  |                       |                    |                      |
| <b>0.1.7</b> Commit to their organization, professional societies, and the community.                                                                                                   |                                                                 |                  |                       |                    |                      |
| <b>0.1.8</b> Engage in regular professional development activities                                                                                                                      |                                                                 |                  |                       |                    |                      |
| <b>0.1.9</b> Engage in professional organization activities                                                                                                                             |                                                                 |                  |                       |                    |                      |
| <b>1 Supervising and Teaching Skills</b>                                                                                                                                                | <b>1.1 Effective Clinical Teaching Skills</b>                   |                  |                       |                    |                      |
| <b>1.1.1</b> Assess learning opportunities for the students.                                                                                                                            |                                                                 |                  |                       |                    |                      |
| <b>1.1.2</b> Give the students responsibilities for patient care while still monitoring their actions in a non-threatening way.                                                         |                                                                 |                  |                       |                    |                      |
| <b>1.1.3</b> Demonstrate procedures.                                                                                                                                                    |                                                                 |                  |                       |                    |                      |
| <b>1.1.4</b> Provide opportunities to do procedures.                                                                                                                                    |                                                                 |                  |                       |                    |                      |
| <b>1.1.5</b> Observe student performance frequently.                                                                                                                                    |                                                                 |                  |                       |                    |                      |
| <b>1.1.6</b> Correct students without belittling them.                                                                                                                                  |                                                                 |                  |                       |                    |                      |
| <b>1.1.7</b> Provide supplementary learning activities, when needed, to achieve all.                                                                                                    |                                                                 |                  |                       |                    |                      |
| <b>1 Supervising and Teaching Skills</b>                                                                                                                                                | <b>1.2 Responsible Teaching</b>                                 |                  |                       |                    |                      |
| <b>1.2.1</b> Be responsible for the actions of their students.                                                                                                                          |                                                                 |                  |                       |                    |                      |
| <b>2 Facilitating Learning</b>                                                                                                                                                          | <b>2.1 Coaching skills, listening skills, positive feedback</b> |                  |                       |                    |                      |
| <b>2.1.1</b> Empower students to ask questions, search for answers, and become independent learners.                                                                                    |                                                                 |                  |                       |                    |                      |



|                                                                                                                                                                    |                                         |  |  |  |  |
|--------------------------------------------------------------------------------------------------------------------------------------------------------------------|-----------------------------------------|--|--|--|--|
| 2.1.2 Question students thoughtfully and encourage feedback.                                                                                                       |                                         |  |  |  |  |
| 2.1.3 Identify and respond to each student specific learning needs.                                                                                                |                                         |  |  |  |  |
| 2.1.4 Challenge the learning process in each student.                                                                                                              |                                         |  |  |  |  |
| 2.1.5 Coach student behavior through effective and timely feedback.                                                                                                |                                         |  |  |  |  |
| 2.1.6 Prioritize student teaching as a primary focus of the practice site.                                                                                         |                                         |  |  |  |  |
| 2.1.7 Treat students as colleagues in training.                                                                                                                    |                                         |  |  |  |  |
| 2.1.8 Inspire students to develop patient care practices.                                                                                                          |                                         |  |  |  |  |
| <b>2 Facilitating Learning</b>                                                                                                                                     | <b>2.2 Active Learning Facilitation</b> |  |  |  |  |
| 2.2.1 Engage students in the process of active learning and good communication.                                                                                    |                                         |  |  |  |  |
| 2.2.2 Help students to become life-long learners.                                                                                                                  |                                         |  |  |  |  |
| 2.2.3 Encourage active participation in a group.                                                                                                                   |                                         |  |  |  |  |
| 2.2.4 Establish a harmonious relationship with students based on understanding.                                                                                    |                                         |  |  |  |  |
| 2.2.5 Show personal interest in students.                                                                                                                          |                                         |  |  |  |  |
| 2.2.6 Facilitate the development of critical thinking, problem solving and decision-making in students.                                                            |                                         |  |  |  |  |
| <b>3 Clarity, Organizational/Time Management Skills, and Enthusiasm</b>                                                                                            | <b>3.1 Organization Skills</b>          |  |  |  |  |
| 3.1.1 Explain clearly.                                                                                                                                             |                                         |  |  |  |  |
| 3.1.2 Present material in an organized manner.                                                                                                                     |                                         |  |  |  |  |
| 3.1.3 Summarize information.                                                                                                                                       |                                         |  |  |  |  |
| 3.1.4 Communicate what is expected to be learned.                                                                                                                  |                                         |  |  |  |  |
| 3.1.5 Teach by example.                                                                                                                                            |                                         |  |  |  |  |
| 3.1.6 Answer questions carefully and precisely.                                                                                                                    |                                         |  |  |  |  |
| 3.1.7 Balance clinical and teaching responsibilities.                                                                                                              |                                         |  |  |  |  |
| 3.1.8 Commit to continuous quality improvement for managerial techniques, clinical skills, and practice sites to support the professionalism of pharmacy practice. |                                         |  |  |  |  |
| <b>3 Clarity, Organizational/Time Management Skills, and Enthusiasm</b>                                                                                            | <b>3.2 Rules and Regulations</b>        |  |  |  |  |
| 3.2.1 Follow rules and regulations set by the program of experiential activities.                                                                                  |                                         |  |  |  |  |
| 3.2.2 Schedule and plan activities such as case discussions, journal club, topic presentations, and other activities set by the program.                           |                                         |  |  |  |  |
| 3.2.3 Document and assess student performance.                                                                                                                     |                                         |  |  |  |  |
| <b>3 Clarity, Organizational/Time Management Skills, and Enthusiasm</b>                                                                                            | <b>3.3 Time Management</b>              |  |  |  |  |
| 3.3.1 Manage their own time well, manage their students' time, and teach students to manage it efficiently.                                                        |                                         |  |  |  |  |



|                                                                                                                                                                    |                                       |  |  |  |  |
|--------------------------------------------------------------------------------------------------------------------------------------------------------------------|---------------------------------------|--|--|--|--|
| 3.3.2 Use tools that can help manage time for students and preceptors.                                                                                             |                                       |  |  |  |  |
| 3.3.3 Allocate activities through the rotation effectively.                                                                                                        |                                       |  |  |  |  |
| 3.3.4 Educate students about the role that time management plays in the financial health of any practice setting.                                                  |                                       |  |  |  |  |
| <b>4 Interpersonal/Communication Skills</b>                                                                                                                        | <b>4.1 Communication Skills</b>       |  |  |  |  |
| 4.1.1 Interact and communicate effectively with administrators, healthcare colleagues, peers, patients, or students to reach desired outcomes.                     |                                       |  |  |  |  |
| 4.1.2 Develop an effective student-preceptor relationship.                                                                                                         |                                       |  |  |  |  |
| 4.1.3 Be willing to listen to the students and learn something new.                                                                                                |                                       |  |  |  |  |
| 4.1.4 Convey confidence in students' abilities to allow them to work harder to reach goals.                                                                        |                                       |  |  |  |  |
| 4.1.5 Provide positive reinforcement and constructive feedback so that students can understand their strengths and improve their weaknesses.                       |                                       |  |  |  |  |
| 4.1.6 Possess conflict management skills and be prepared to teach students to use them.                                                                            |                                       |  |  |  |  |
| 4.1.7 Use public speaking skills to speak effectively in large and small group situations.                                                                         |                                       |  |  |  |  |
| 4.1.8 Provide effective medication and onsite-related education training/presentations to students, pharmacists, and other healthcare professionals.               |                                       |  |  |  |  |
| <b>5 Cultural Competency Skills</b>                                                                                                                                | <b>5.1 Cultural Competency Skills</b> |  |  |  |  |
| 5.1.1 Provide care to patients with diverse values, beliefs, and behaviors, including tailoring delivery to meet patients' social, cultural, and linguistic needs. |                                       |  |  |  |  |
| 5.1.2 Appreciate and value cultural differences to provide high-quality care to patients from diverse backgrounds.                                                 |                                       |  |  |  |  |
| 5.1.3 Respect and value these differences among students and collaborate in a manner that promotes education.                                                      |                                       |  |  |  |  |
| 5.1.4 Strive to foster an attitude of cultural competence in their students.                                                                                       |                                       |  |  |  |  |
| 5.1.5 Encourage student pharmacists to accept and respect differences.                                                                                             |                                       |  |  |  |  |
| 5.1.6 Create an open and trusting environment for communication with people from diverse cultures.                                                                 |                                       |  |  |  |  |
| 5.1.7 Have the will to self-assess their performance in working with patients from differing backgrounds.                                                          |                                       |  |  |  |  |
| 5.1.8 Provide students with resources, such as links to websites that support cultural competency and diversity to help expand their cultural knowledge.           |                                       |  |  |  |  |
| <b>6 Leadership Skills</b>                                                                                                                                         | <b>6.1 Leadership Skills</b>          |  |  |  |  |
| 6.1.1 Demonstrate effective managerial and leadership relationships with pharmacist colleagues and staff.                                                          |                                       |  |  |  |  |



|                                                                                                                                                 |                                                     |  |  |  |  |
|-------------------------------------------------------------------------------------------------------------------------------------------------|-----------------------------------------------------|--|--|--|--|
| 6.1.2 Demonstrate aspects of humility related to own limitations.                                                                               |                                                     |  |  |  |  |
| 6.1.3 Monitor quality of professional practice and teaching activities.                                                                         |                                                     |  |  |  |  |
| 6.1.4 Evaluate and refine the practice and activities on an ongoing basis to continually improve their activities in the pursuit of excellence. |                                                     |  |  |  |  |
| 6.1.5 Practice non-discriminatory behaviors.                                                                                                    |                                                     |  |  |  |  |
| 6.1.6 Embody a personal practice philosophy.                                                                                                    |                                                     |  |  |  |  |
| 6.1.7 Demonstrate personal motivation and inspiring students and pharmacists to develop patient care practices.                                 |                                                     |  |  |  |  |
| 6.1.8 Have a mission or vision statement of pharmacy.                                                                                           |                                                     |  |  |  |  |
| 6.1.9 Encourage administration to support patientcare service.                                                                                  |                                                     |  |  |  |  |
| <b>6 Leadership Skills</b>                                                                                                                      | <b>6.2 Motivation</b>                               |  |  |  |  |
| 6.2.1 Have the desire to educate others (patients, caregivers, other healthcare professionals, students, pharmacy residents).                   |                                                     |  |  |  |  |
| 6.2.2 Demonstrate enjoyment and enthusiasm for patient care and teaching.                                                                       |                                                     |  |  |  |  |
| 6.2.3 Adapt a stimulating style of presentation to capture student’s attention.                                                                 |                                                     |  |  |  |  |
| 6.2.4 Stimulate interest in the subject and motivate students to learn.                                                                         |                                                     |  |  |  |  |
| <b>7 Knowledge and Clinical Skills</b>                                                                                                          | <b>7.1 Clinical Skills</b>                          |  |  |  |  |
| 7.1.1 Possess clinical skills and use them in practice.                                                                                         |                                                     |  |  |  |  |
| <b>7 Knowledge and Clinical Skills</b>                                                                                                          | <b>7.2 Other Technical Skills</b>                   |  |  |  |  |
| 7.2.1 Use effective educational techniques in the design of all educational activities.                                                         |                                                     |  |  |  |  |
| 7.2.2 Use information technology to make decisions and reduce errors.                                                                           |                                                     |  |  |  |  |
| <b>8 Research and Project Management Skills</b>                                                                                                 | <b>8.1 Research &amp; Project Management Skills</b> |  |  |  |  |
| 8.1.1 Participate in a practice-related research project using effective project management skills.                                             |                                                     |  |  |  |  |
| 8.1.2 Encourage students to present and publish their work on projects.                                                                         |                                                     |  |  |  |  |
| <b>9 Pharmacist Emergency Preparedness and Response (EPR)</b>                                                                                   | <b>9.1 Emergency Preparedness and Response</b>      |  |  |  |  |
| 9.1.1 Check for volunteering opportunities                                                                                                      |                                                     |  |  |  |  |
| 9.1.2 Check for training opportunities                                                                                                          |                                                     |  |  |  |  |
| 9.1.3 Address medication shortage and mitigation plan with students and peers                                                                   |                                                     |  |  |  |  |
| 9.1.4 Facilitate the educational institution partnering with local authorities                                                                  |                                                     |  |  |  |  |
| 9.1.5 Check for FDA/EMA Emergency Use Authorizations (EUAs) and expedited review and approval of tests/drugs for treatment                      |                                                     |  |  |  |  |
| 9.1.6 Follow actions and recommendations of local authorities                                                                                   |                                                     |  |  |  |  |
